# Supplementary figures and images for: Significantly Enhanced Self-Cleaning Capability in Anatase TiO2 for the Bleaching of Organic Dyes and Glazes
Source: MDPI journal article supplement (doi:10.3390/inorganics11080341), 2023-08-18

## Supporting Information

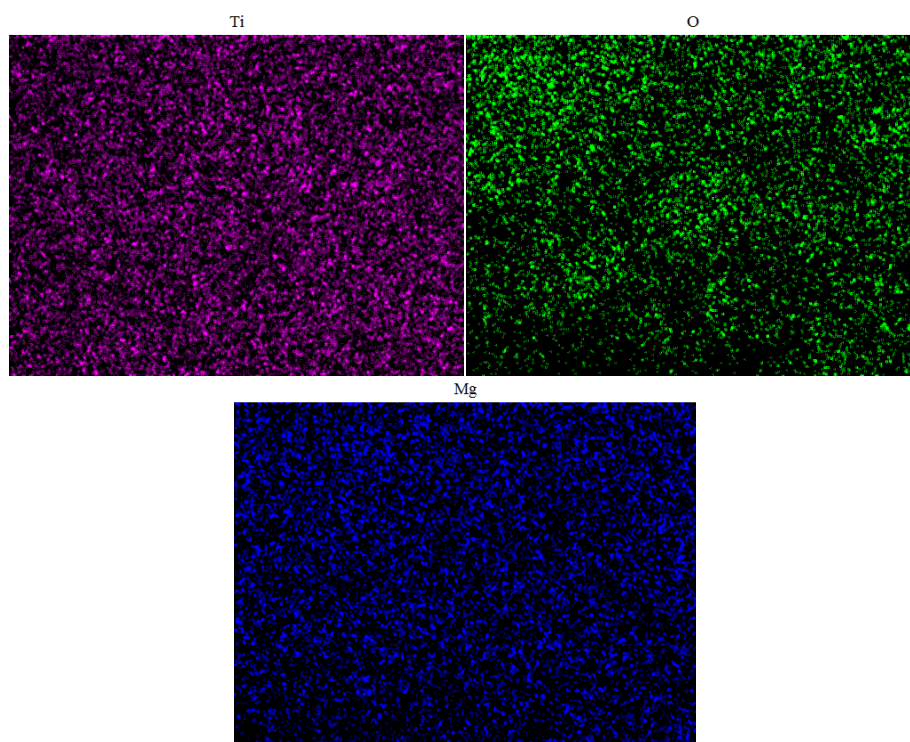

**Figure S1** EDX spectroscopy mapping performed in the TEM microscope

Supplement: s1 [file s1]
